# Supplementary material for: A van der Waals porous crystal featuring conformational flexibility and permanent porosity for ultrafast water release
Source: PubMed Central journal article supplement — Commun Chem. 2024 Nov 30;7:282. doi: 10.1038/s42004-024-01366-1 (PMC11608220; doi:10.1038/s42004-024-01366-1), 2024-11-30
Supplement: 42004_2024_1366_MOESM3_ESM.pdf [file 42004_2024_1366_MOESM3_ESM.pdf]

# Description of Additional Supplementary Files

**File name: Supplementary Data 1**

**Description:** Crystallographic information file for VPC-1 under vacuum

**File name: Supplementary Data 2**

**Description:** Crystallographic information file for VPC-1 under atmosphere with a humidity of 92 %RH

**File name: Supplementary Data 3**

**Description:** Crystallographic information file for VPC-1 under atmosphere with a humidity of 0 %RH

**File name: Supplementary Data 4**

**Description:** Adsorption information file for N<sub>2</sub> adsorption of VPC-1 at 77 K

**File name: Supplementary Data 5**

**Description:** Adsorption information file for H<sub>2</sub>O adsorption of VPC-1 at 283 K

**File name: Supplementary Data 6**

**Description:** Adsorption information file for H<sub>2</sub>O adsorption of VPC-1 at 293 K

**File name: Supplementary Data 7**

**Description:** Adsorption information file for H<sub>2</sub>O adsorption of VPC-1 at 303 K

**File name: Supplementary Data 8**

**Description:** Adsorption information file for H<sub>2</sub>O adsorption of USG-PT-SX-200 at 298 K

**File name: Supplementary Data 9**

**Description:** Adsorption information file for H<sub>2</sub>O adsorption of USG-CT-S-200 at 298 K

**File name: Supplementary Data 10**

**Description:** Adsorption information file for H<sub>2</sub>O adsorption of carbon nanotubes at 298 K

**File name: Supplementary Data 11**

**Description:** Adsorption information file for H<sub>2</sub>O adsorption of zeolite at 298 K

**File name: Supplementary Data 12**

**Description:** Adsorption information file for H<sub>2</sub>O adsorption of silica gel at 298 K

**File name: Supplementary Data 13**

**Description:** Cartesian coordinates of the optimized computational models
